# Supplementary material
Source: Springer Nature journal article supplement (https://www.springermedizin.de/resource/supplementary/12958_2006_305_MOESM5_ESM.pdf/9567586)

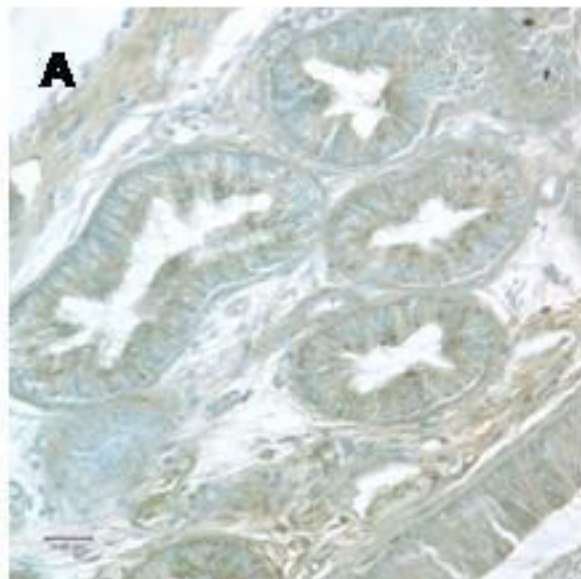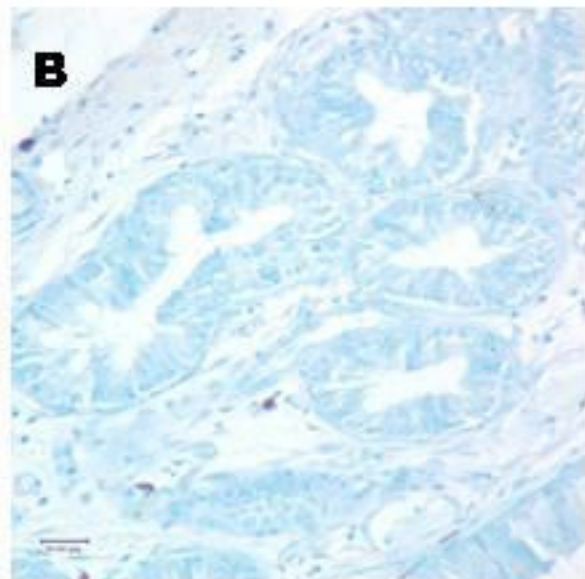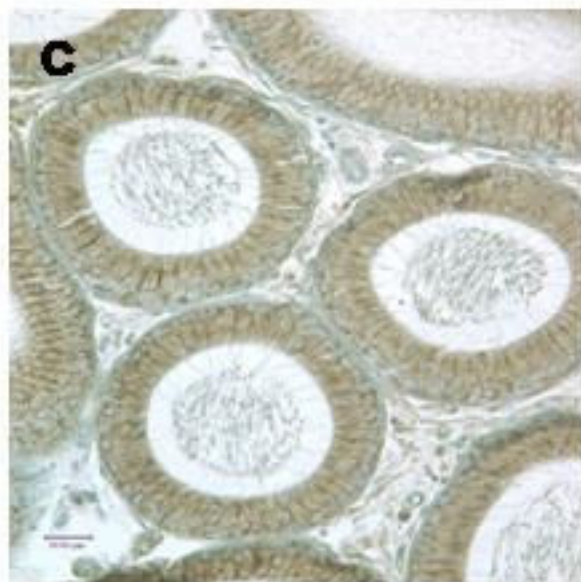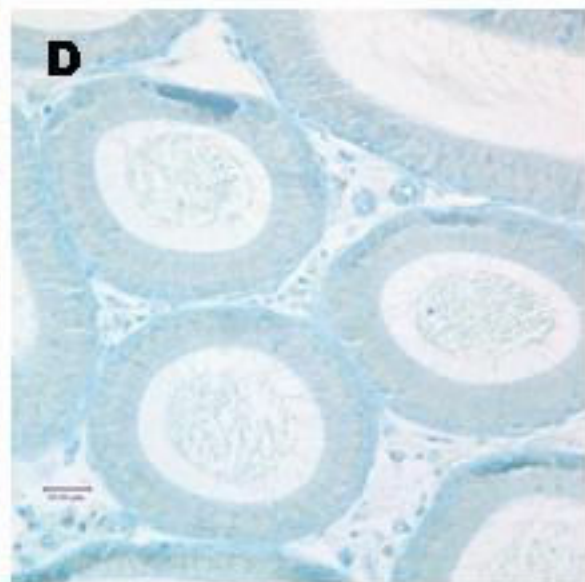

Supplement: MOESM5 [file 9567586]
